# Supplementary material for: NIR light, pH, and redox-triple responsive nanogels for controlled release
Source: Royal Society of Chemistry journal article supplement (doi:10.1039/d3sm00667k), 2023-01-01
Supplement: d3sm00667k1.pdf [file d3sm00667k1.pdf]

# NIR light, pH, and redox-triple responsive nanogels for controlled release

## Supporting Information

Shuo Chen,<sup>a</sup> Shuai Yuan,<sup>\*a</sup> Qing Bian,<sup>\*b</sup> Bo Wu,<sup>\*c</sup>

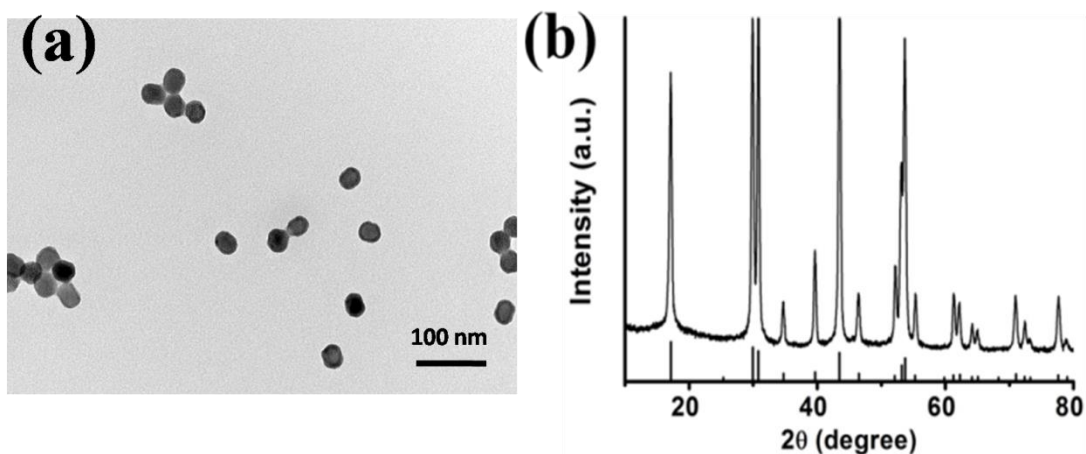

Fig. S1(a) Transmission electron microscopy (TEM) image of the UCNP; (b) XRD patterns of  $\beta$ -NaYbF<sub>4</sub>: 25% Yb, 0.5% Tm.

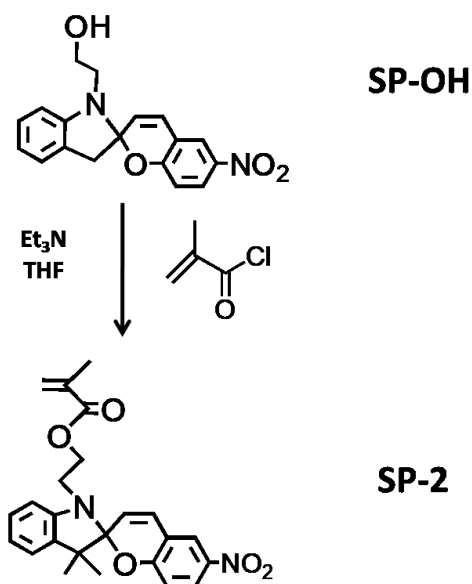

Fig. S2 Synthetic route of SP-2.

SP-2 was prepared according to reported procedure<sup>s1</sup> and the synthetic route has been shown in Figure S2. <sup>1</sup>H NMR (300MHz, CDCl<sub>3</sub>): 1.176(s,

6H,-C(CH<sub>3</sub>)<sub>2</sub>), 1.897 (s, 3H, =C-CH<sub>3</sub>), 3.393–3.552 (m, 2H,-N-CH<sub>2</sub>-), 4.273 (t, 2H, -O-CH<sub>2</sub>-), 5.545 and 6.053 (s, 2H, =CH<sub>2</sub>), 6.642–6.748 (d, 2H, Ar-Hand -CH=), 6.878–6.963 (m, 2H, Ar-H),7.073–7.104 (m, 1H,Ar-H), 7.172–7.240 (m,1H,Ar-H), 7.990–8.016 (m, 2H, Ar-H).

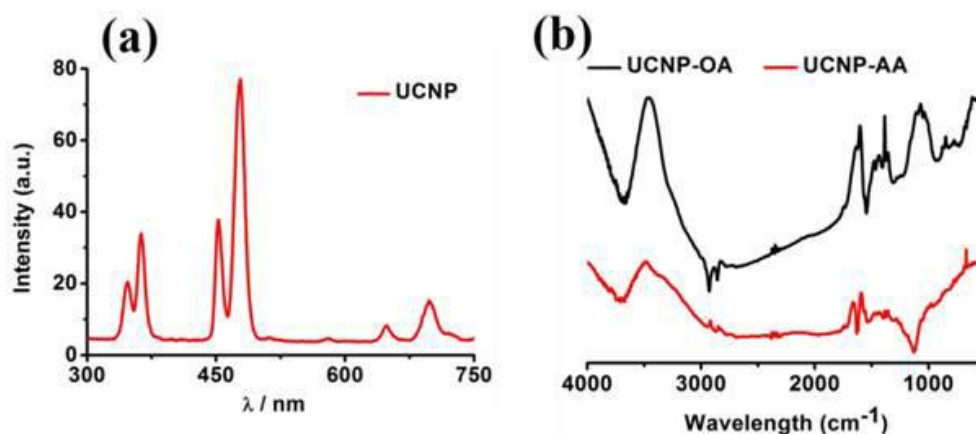

**Fig. S3 (a) Upconversion luminescence spectrum of the synthesized UCNP-AA, excited at 980 nm; (b) Fourier transform infrared (FT-IR) spectra of the UCNP-OA (black) and UCNP-AA (red).**

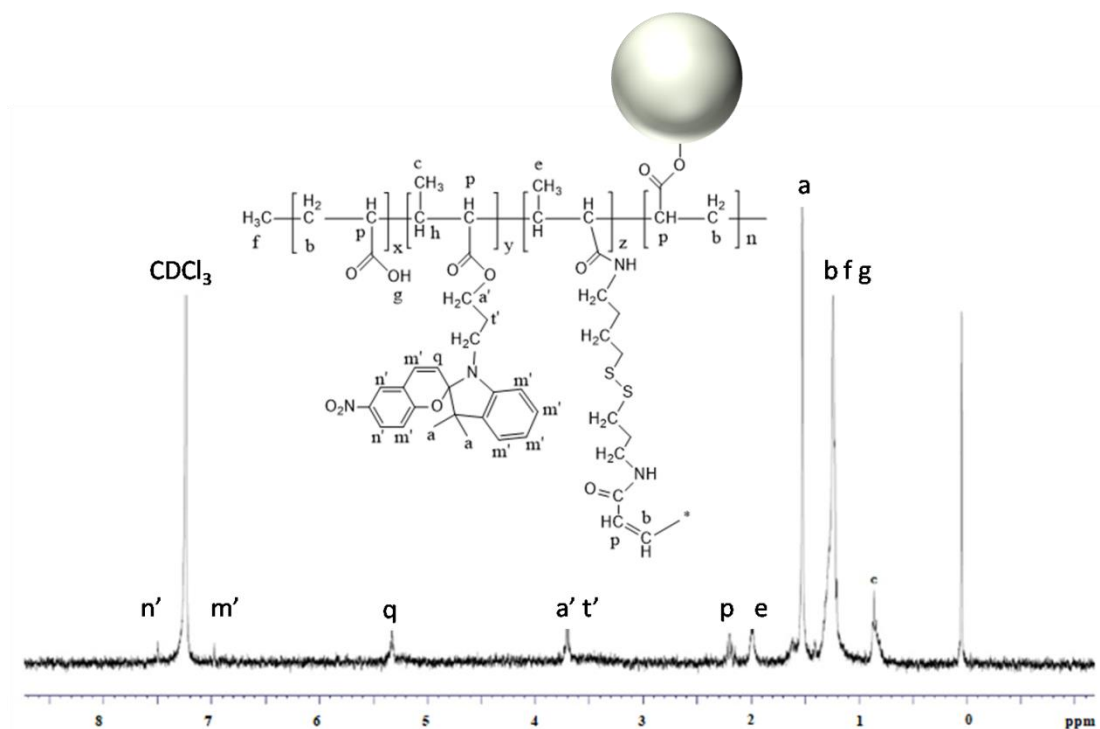

**Fig.S4 <sup>1</sup>H NMR spectrum of UCNP-NGs in CDCl<sub>3</sub>(300 MHz)**

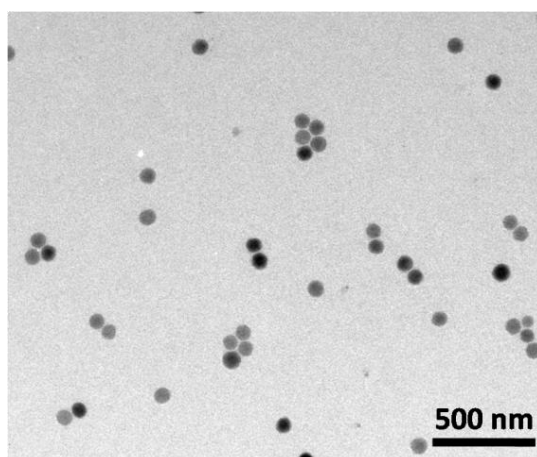

**Fig. S5 TEM image of polymerized UCNPs-AA.**

The UCNPs-AA was polymerized independent, which adopted the reaction conditions in the paper. Figure S5 showed that nanoparticles were dispersed, which indicated that UCNPs-AA could not self-aggregate under the conditions of literature.

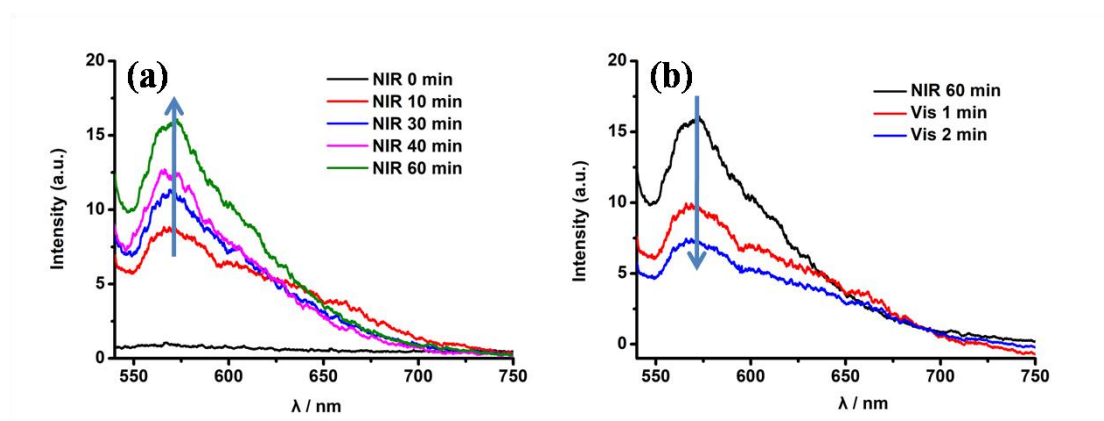

**Fig.S6 The fluorescence spectra of the UCNPs-NGs: (a) Irradiated with NIR light (980 nm, 4.3W cm<sup>-2</sup>), (b) then irradiated with visible light (520 nm, 20 mW cm<sup>-2</sup>)**

The MC structure is a fluorescent group, and the excitation wavelength of MC group is 565 nm. As shown in the Figure S6(a), the fluorescence intensity of MC increases with the increase of NIR irradiation time, which indicates that SP in the nanogel is transforming into MC after NIR

irradiation for a certain time. As shown in the Figure S6(b), the fluorescence intensity of MC decreases with the increase of visible irradiation time, which indicates that MC in the nanogel is transforming into SP after visible irradiation for a certain time.

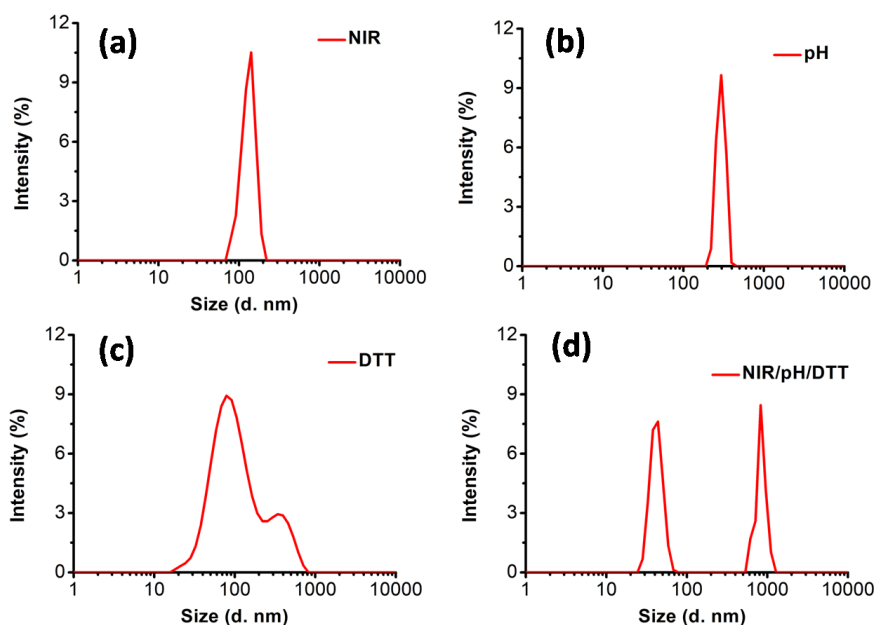

**Fig. S7 Size distribution from DLS analysis of the UCNP-NGs under different stimuli: (a) without stimulation; (b) under NIR irradiation for 10 min; (c) at pH 5 for 12 h; (d) in the presence of DTT (4 mM) for 12 h; (e) combined stimulation of NIR light irradiation (3 min), pH 6 and in the presence of DTT (4 mM) for 12 h.**

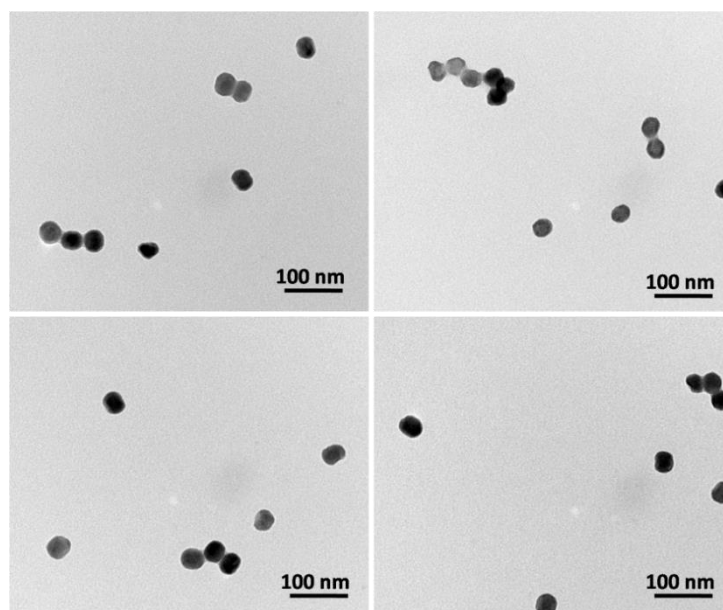

**Fig.S8 The TEM images of UCNP-AA under different stimuli: (a) under NIR irradiation for 10 min; (b) at pH 5 for 12 h; (c) in the presence of DTT (4 mM) for 12 h ;(d) combined stimulation of NIR light irradiation (3 min), pH 6 and in the presence of DTT (4 mM) for 12 h.**

As shown in Figure S8, under different stimuli, the morphology of UCNP-AA is basically consistent, indicating that the morphology changes of UCNP-NGs are mainly caused by stimulus-responsive polymers under different stimuli.

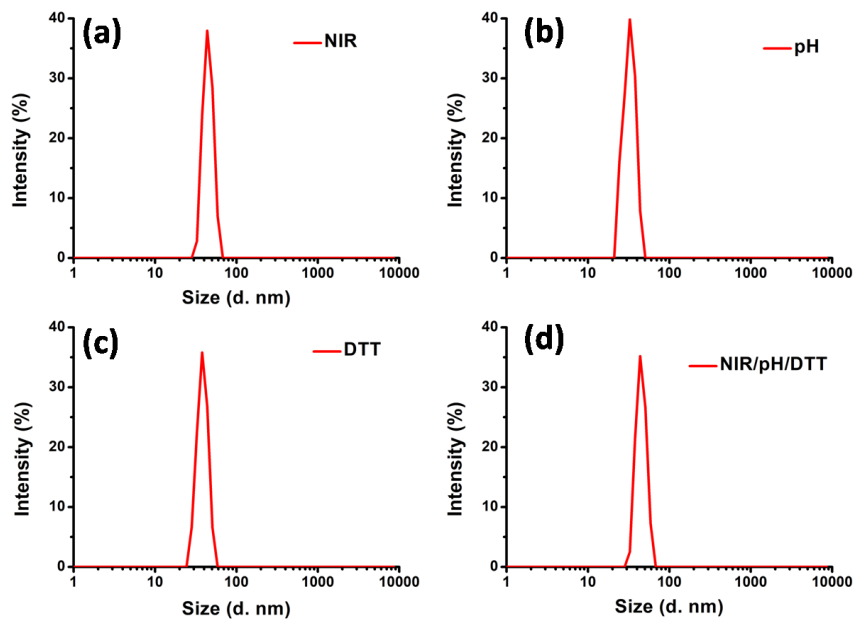

**Fig.S9 Size distribution from DLS analysis of the UCNP-AA under different stimuli: (a)under NIR irradiation for 10 min;(b) at pH 5 for 12h; (c) in the presence of DTT (4 mM) for 12 h; (d)combined stimulation of NIR light irradiation (3 min), pH 6 and in the presence of DTT (4 mM) for 12 h.**

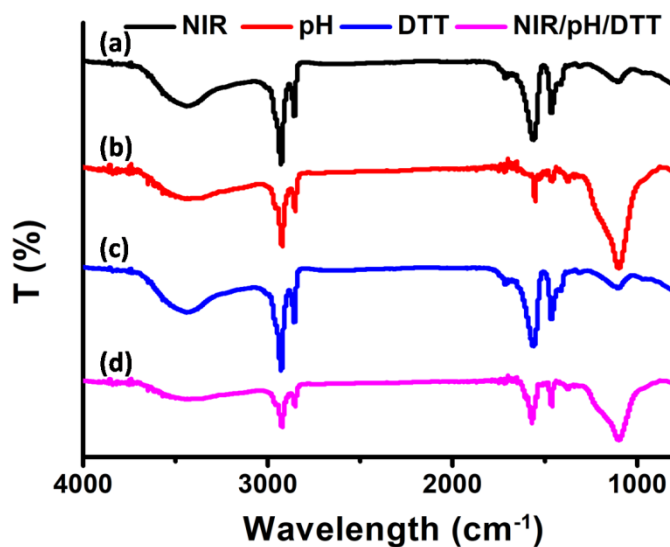

**Fig.S10 FT-IR spectra of the UCNP-AA under different stimuli: (a)under NIR irradiation for 10 min;(b) at pH 5 for 12h; (c) in the**

presence of DTT (4 mM) for 12 h; (d) combined stimulation of NIR light irradiation (3 min), pH 6 and in the presence of DTT (4 mM) for 12 h.

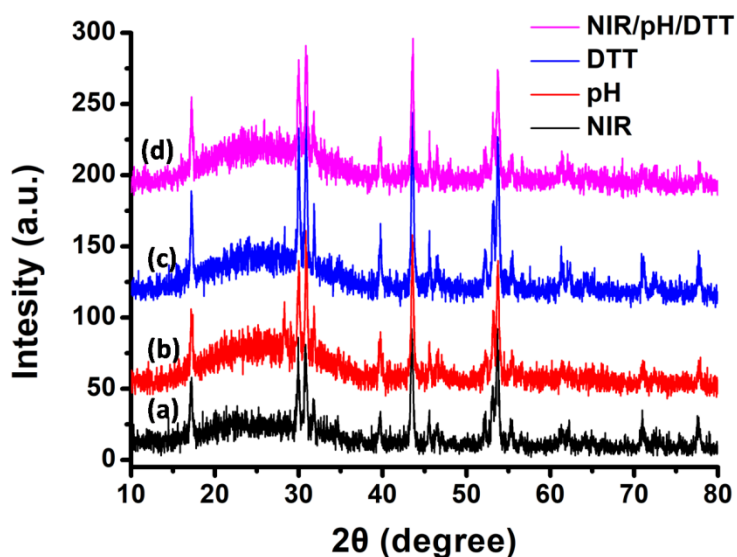

**Fig.S11 XRD patterns of UCNP-AA under different stimuli: (a) under NIR irradiation for 10 min; (b) at pH 5 for 12h; (c) in the presence of DTT (4 mM) for 12 h; (d) combined stimulation of NIR light irradiation (3 min), pH 6 and in the presence of DTT (4 mM) for 12 h.**

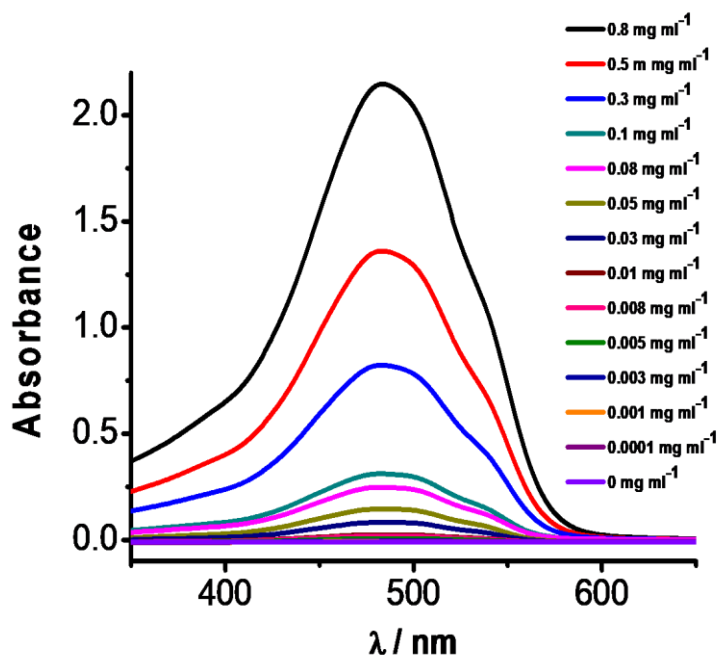

Fig. S12 UV-vis spectra of DOX with different concentrations.

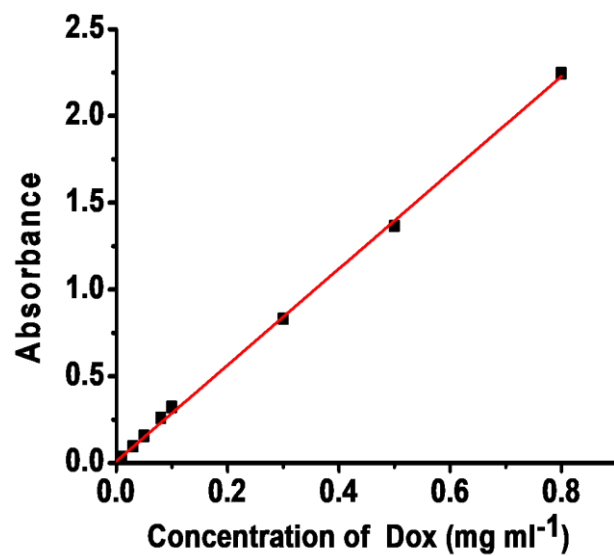

Fig. S13 DOX calibration curve.



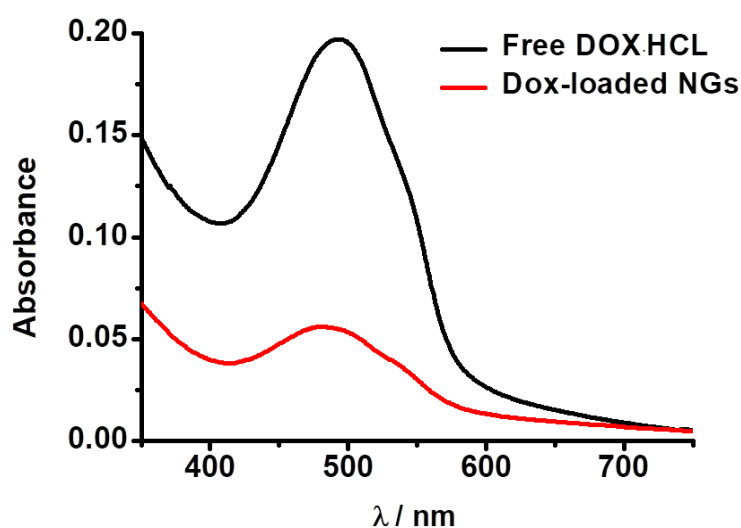

**Fig.S14 UV-vis spectra of the UCNP-NGs mixed with DOX after 72 h dialysis (DOX initial concentration: 1 mg, red) and free DOX (1 mg, black).**

DOX·HCl (1 mg) was dissolved in water (5 mL) and then UCNP-NGs (2 mg) were added to the solution, stirred at room temperature for 24 h. Then the mixture was subjected to dialysis (MWCO: 3500 Da) against distilled water for 72 hours to remove the free drug. The samples were lyophilized to obtain the DOX-loaded UCNP-NGs, which were kept at 4 °C for further study. All the drug loading processes were performed under dark. The DOX concentration was determined by spectrophotometry ( $\lambda_{\text{max}} = 490 \text{ nm}$ ) using a DOX calibration curve (Figure S12). The loading capacity (LC) of UCNP-NGs was about 13% which was calculated by the following formula:

$$LC(\text{wt}\%) = \frac{\text{weight of loaded Dox}}{\text{weight of NGs}} \times 100\%$$

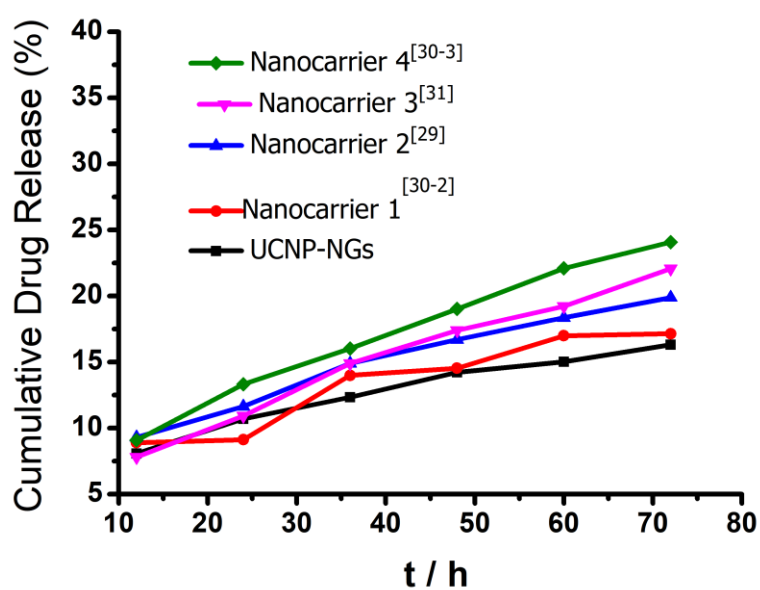

**Fig.S15 The drug loaded stability of different nanoconpsites: (a) self-assembled nanohybrids; (b) self-assembled nano-micelles; (c) UCNP-NGs.**

**Table 1 Drug loading capacity of different Nanocarriers**

| Nanocarriers                                 | Loading capacity |
|----------------------------------------------|------------------|
| UCNP-NGs                                     | 13%              |
| UCNPs@Polymer nanocomposites <sup>[31]</sup> | 11%              |
| NGs <sup>[28-1]</sup>                        | 18%              |
| PDMAEMA micelles <sup>[28-2]</sup>           | 19%              |

**Table 2** Size distribution and change reason of UCNP-NGs under different stimuli

| Stimuli              | TEM image                                                                           | From TEM   | From DLS         | Reason                                           |
|----------------------|-------------------------------------------------------------------------------------|------------|------------------|--------------------------------------------------|
| NIR light            | 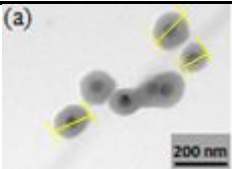   | 100-120 nm | 98 nm            | SP→MC                                            |
| pH                   |    | 220-280 nm | 266 nm           | SP→MCH <sup>+</sup>                              |
| DTT                  |   | 100-430 nm | 105 nm<br>397 nm | S-S bonds broken                                 |
| Combined stimulation |  | 70-990 nm  | 91 nm<br>822 nm  | SP→MC/ SP→MCH <sup>+</sup> /<br>S-S bonds broken |

## References

- [S1]S. Chen, F. Jiang, Z. Cao,G. Wang, Z. Dang, *Chem. Commun.*, 2015, **51**, 12633-12636.
